# Supplementary material for: Dendritic nanotubes self-assembled from stiff polysaccharides as drug and probe carriers
Source: Royal Society of Chemistry journal article supplement (doi:10.1039/c7tb00213k), 2017-01-01
Supplement: c7tb00213k1.pdf [file c7tb00213k1.pdf]

## For Supporting Information

# Dendritic Nanotubes Self-assembled from Stiff Polysaccharide as Drug and Probe Carriers

Yan Meng<sup>1</sup>, Siwei Zou<sup>1</sup>, Meijuan Jiang<sup>2</sup>, Xiaojuan Xu<sup>\*1</sup>, Ben Zhong Tang<sup>\*2</sup>, Lina Zhang<sup>\*1</sup>

<sup>1</sup> *College of Chemistry & Molecule Sciences, Wuhan University, Wuhan 430072, China*

<sup>2</sup> *Department of Chemistry, The Hong Kong University of Science & Technology, Clear Water Bay, Kowloon, Hong Kong, China*

\*Correspondence to: L. Zhang (E-mail: [zhangln@whu.edu.cn](mailto:zhangln@whu.edu.cn))

B. Tang (E-mail: [tangbenz@ust.hk](mailto:tangbenz@ust.hk))

and X. Xu (E-mail: [xuxj@whu.edu.cn](mailto:xuxj@whu.edu.cn))

**Table S1.** Experimental results of AF1 and its fractions from static and dynamic light scattering in water at 25°C.

| Sample | $M_w \times 10^{-4}$<br>(g/mol) | $R_h$ (nm) | $R_g$ (nm) | $\rho = R_g/R_h$ |
|--------|---------------------------------|------------|------------|------------------|
| AF1    | 216                             | 87.5       | 215        | 2.45             |
| AF1-1  | 173                             | 67.3       | 167        | 2.48             |
| AF1-2  | 142                             | 59.3       | 131        | 2.21             |

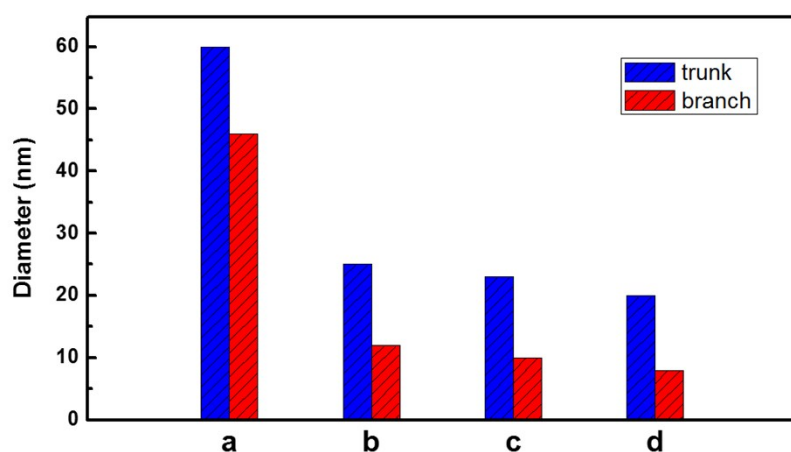

**Figure S1.** The mean diameters of “trunks” and “branches” of the dendritic nanotubes from Figure 2a, b, c, d.

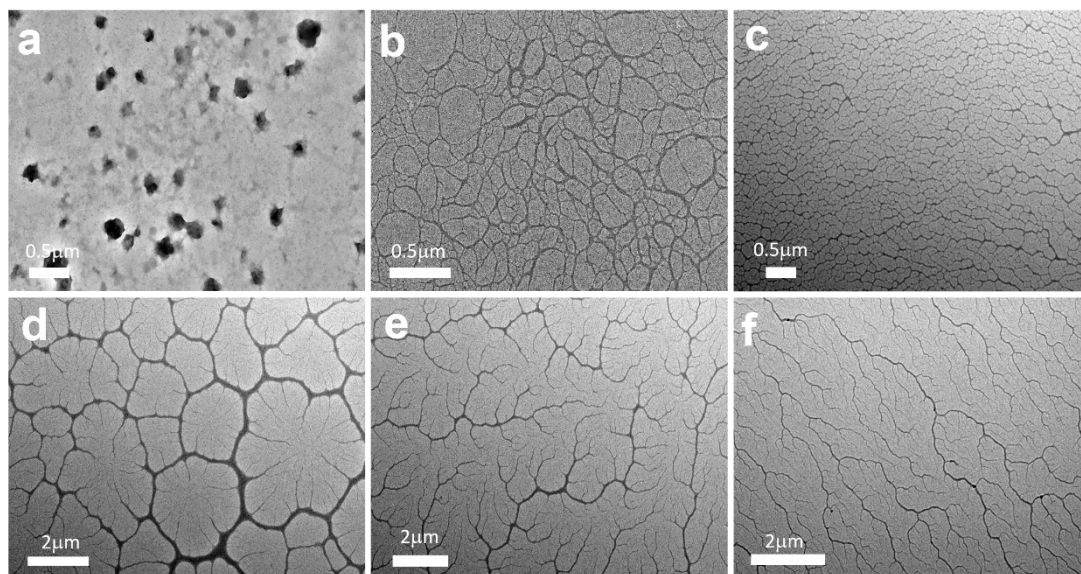

**Figure S2.** TEM images of AF1 in DMSO ( $1 \times 10^{-3}$  g/mL) (a) and the dialyzed AF1 in water at different dialysis time points of 20 hours (content of DMSO was about 3%) (b), 30 hours (content of DMSO was about 1%) (c), 2 days (content of DMSO was about ~0%) (d), 3 days (content of DMSO was about 0%) (e), and 7 days (content of DMSO was about 0%) (f).

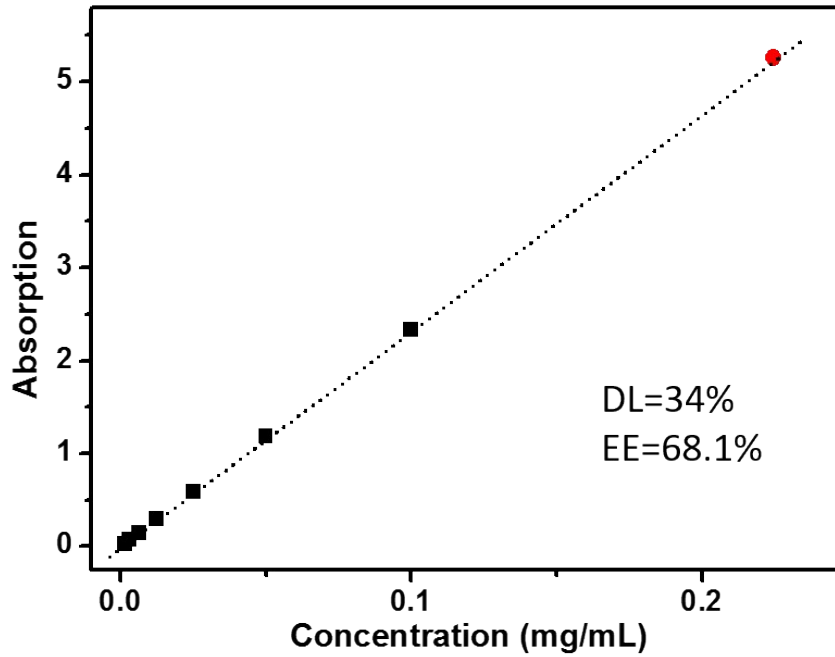

**Figure S3.** The standard absorption curve of DOX in DMSO solution ( $y = 23.388x + 0.0007$ ), and the red point indicated the test solution.

Then 5 mL of AF1-DNTs/DOX solution was freeze-dried and the mass weight was 3.3mg, thus the real concentration of test AF1-DNTs/DOX was 0.66 mg/mL. The first feed ratio was (1:1)

$$DLC (wt \%) = \frac{DOX \text{ content in the DNTs}}{\text{The mass of DOX/DNTs}} = \frac{0.225}{0.66} = 34.0\%$$

$$DEE (\%) = \frac{DOX \text{ content in the DNTs}}{\text{Given content of DOX}} = \frac{0.225}{0.33} = 68.1\%$$

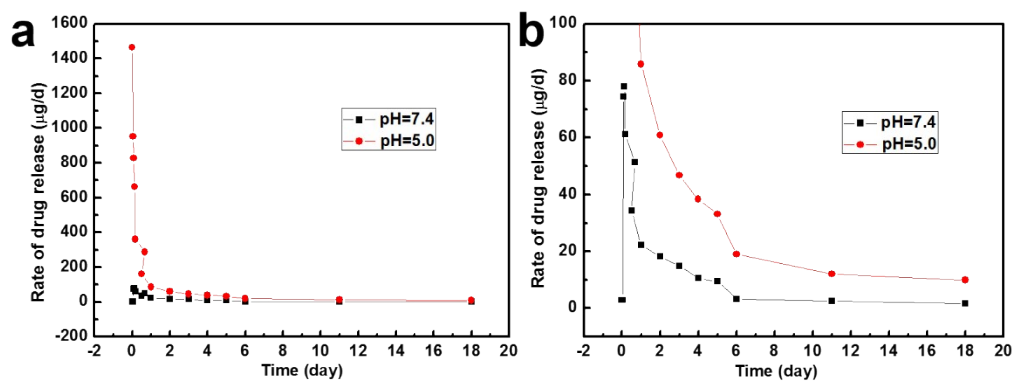

**Figure S4.** Rate of DOX release from AF1-DNTs/DOX at pH values of 5.0 and pH 7.4 (a), and the magnified image (b) of (a).

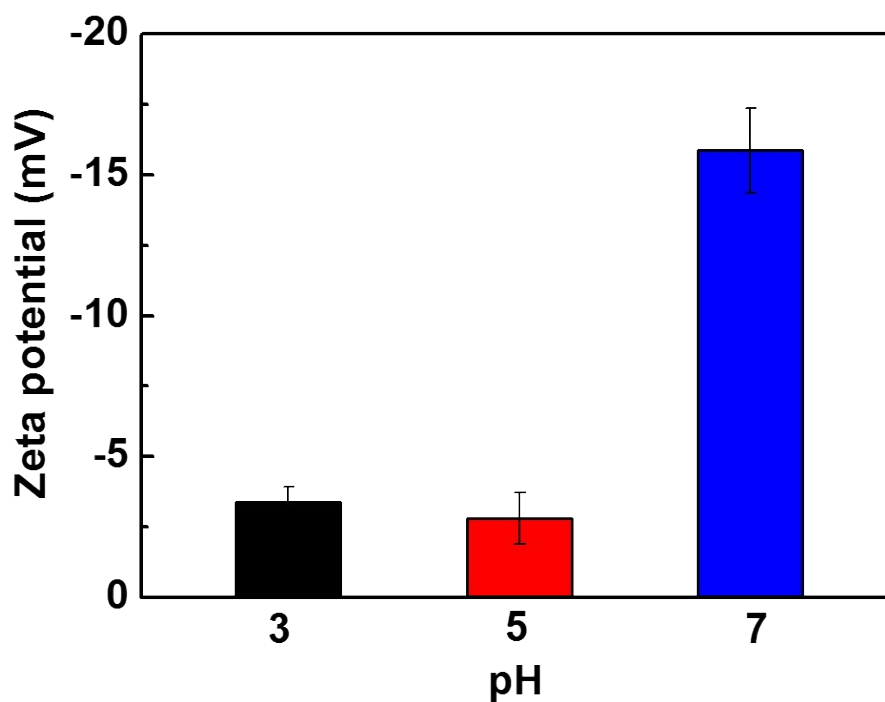

**Figure S5.** Values of the zeta potential of AF1-DNTs (0.5 mg/mL) as a function of pH at 25 °C. Data are represented as mean  $\pm$  standard deviation (n = 3).

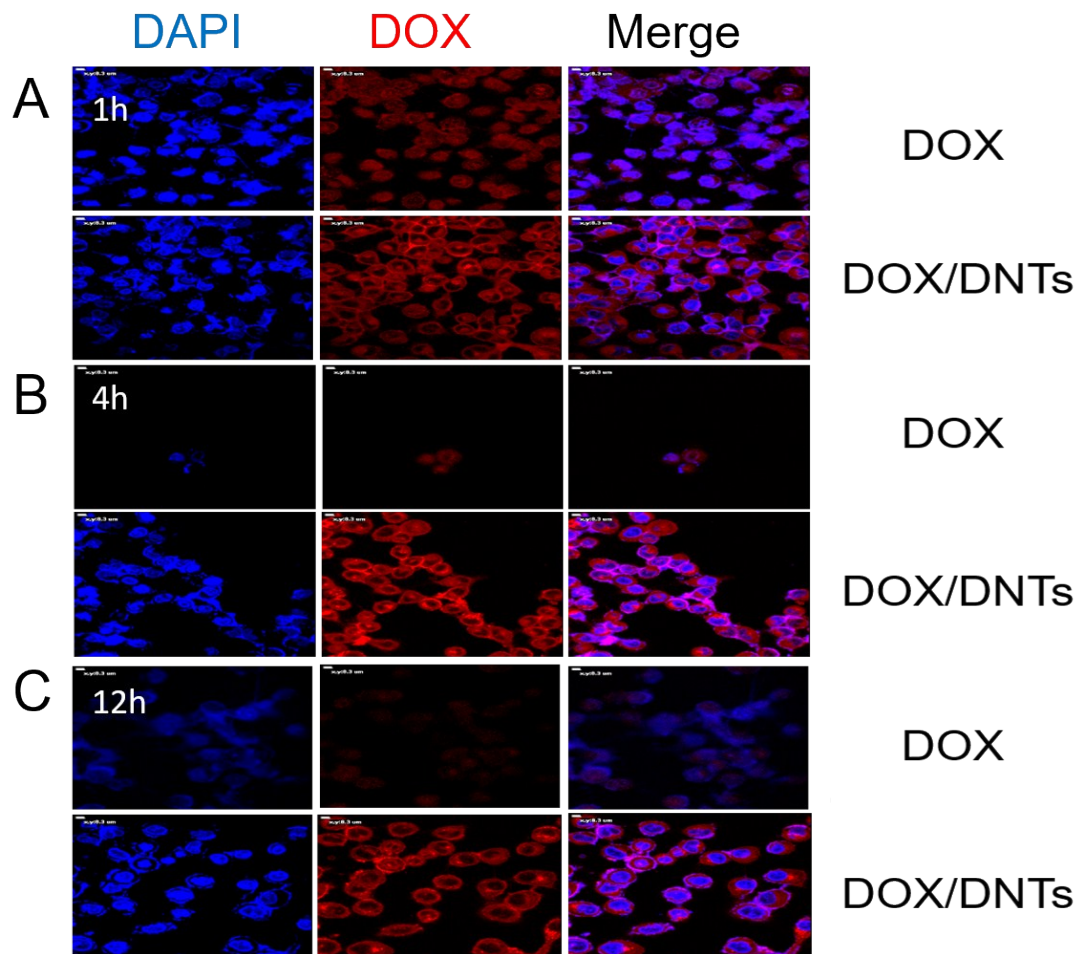

**Figure S6.** Confocal laser scanning microscopy (CLSM) images of MCF-7 cells treated with DOX and AF1-DNTs/DOX for 1 h (A), 4 h (B), and 12 h (C) with DOX concentration fixed at  $1 \times 10^{-6}$  g/ml. From left to right, the images show cell nuclei stained by DAPI (blue), DOX fluorescence (red), and the merging of the two images.

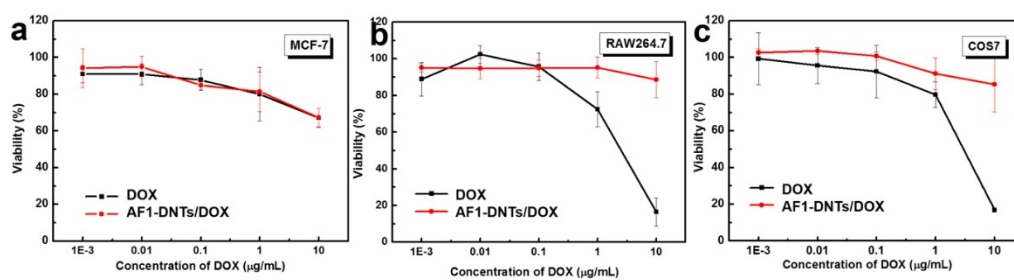

**Figure S7.** Effect of free DOX and AF1-DNTs/DOX on the cell viability of human MCF-7 breast cancer cells (a), mouse macrophage RAW264.7 cells (b), and COS7 cells (c) after incubation for 24 hours. Each value represents the mean  $\pm$  SD of three independent experiments.

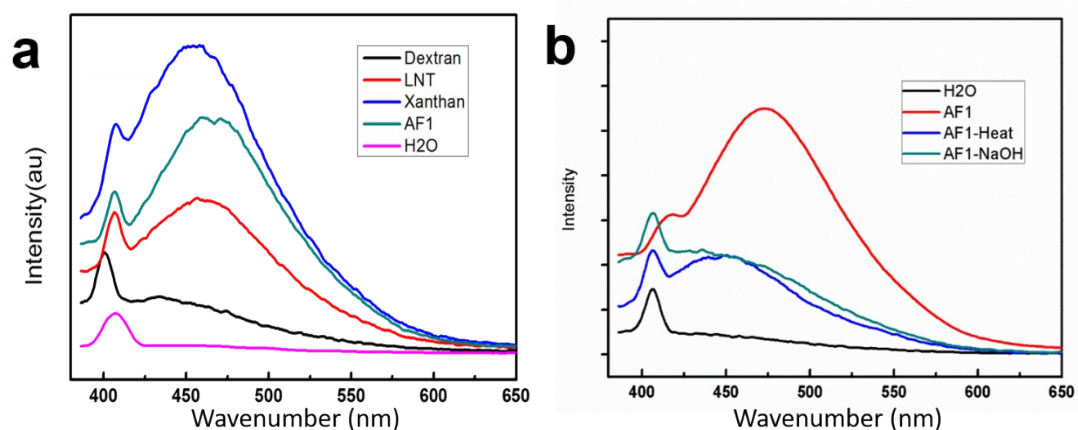

**Figure S8.** Changes in fluorescent spectrum of BSPOTPE ( $1 \times 10^{-6}$  g/mL) in the presence of different polysaccharides (dextran, lentinan, xanthan and AF1) with concentrations of 10, 1, 1, 1 mg/mL, respectively (a). The fluorescent intensity of AF1-DNTs/ BSPOTPE under different conditions (b). AF1 solution was heated at  $160^\circ\text{C}$  or dissolved in NaOH to destroy the assemblies of AF1-DNTs.

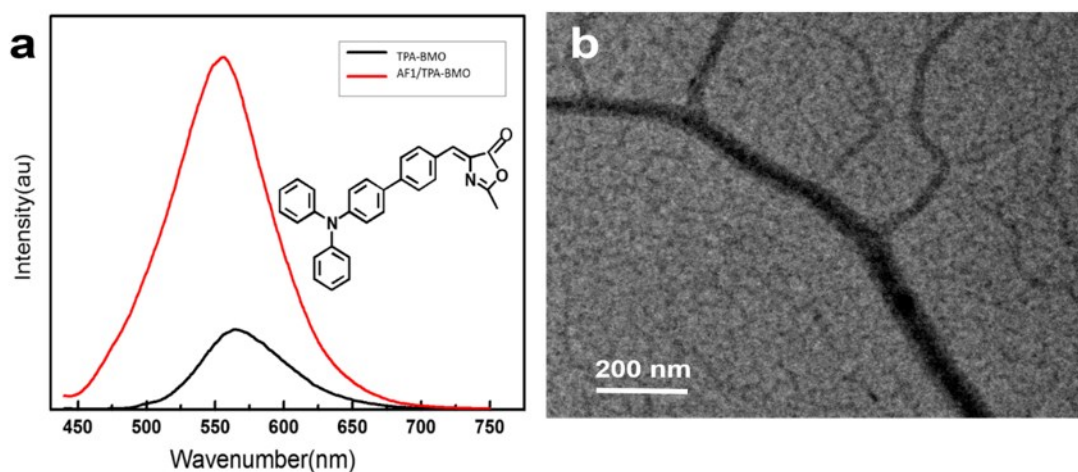

**Figure S9.** Fluorescent spectrum of TPA-BMO ( $1.0 \times 10^{-6}$  g/mL) with and without AF1-DNTs (a) with the inset of the chemical structure for TPA-BMO, and the TEM image of AF1-DNTs/TPA-BMO.

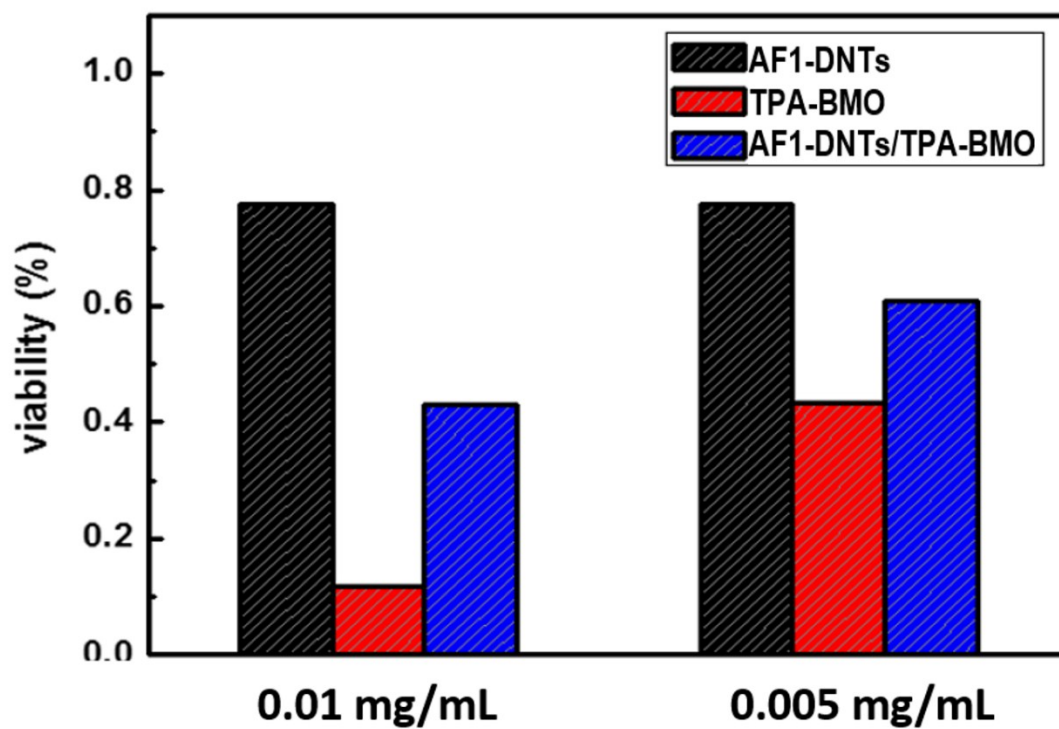

**Figure S10.** The effect of AF1-DNTs/TPA-BMO on the cell viability of HeLa cells.
